# Supplementary material
Source: PubMed Central journal article supplement (PMC2704592)
Supplement: fj.08-124321_1.pdf [file fj.08-124321_1.pdf]

**Supplementary table 1.** *Genes on chromosome 2 region from haplotype analysis.*


---

|               |                                                                                |
|---------------|--------------------------------------------------------------------------------|
| Thbs1         | thrombospondin 1                                                               |
| Fsip1         | fibrous sheath-interacting protein 1                                           |
| A930104D05Rik | RIKEN cDNA A930104D05 gene                                                     |
| Gpr176        | G protein-coupled receptor 176                                                 |
| 1700054M17Rik | RIKEN cDNA 1700054M17 gene                                                     |
| Eif2ak4       | eukaryotic translation initiation factor 2 alpha kinase 4                      |
| Srp14         | signal recognition particle 14                                                 |
| Bmf           | BCL2 modifying factor                                                          |
| Bub1b         | budding uninhibited by benzimidazoles 1 homolog, beta ( <i>S. cerevisiae</i> ) |
| Pak6          | p21 (CDKN1A)-activated kinase 6                                                |
| Gm1337        | gene model 1337, (NCBI)                                                        |
| Plcb2         | phospholipase C, beta 2                                                        |
| 5430417L22Rik | RIKEN cDNA 5430417L22 gene                                                     |
| A430105I19Rik | RIKEN cDNA A430105I19 gene                                                     |
| 1810007E14Rik | RIKEN cDNA 1810007E14 gene                                                     |
| Disp2         | dispatched homolog 2 ( <i>Drosophila</i> )                                     |
| Ivd           | isovaleryl coenzyme A dehydrogenase                                            |
| Bahd1         | bromo adjacent homology domain containing 1                                    |
| Chst14        | carbohydrate (N-acetylgalactosamine 4-0) sulfotransferase 14                   |
| Ccdc32        | coiled-coil domain containing 32                                               |
| Rpusd2        | RNA pseudouridylate synthase domain containing 2                               |
| Casc5         | cancer susceptibility candidate 5                                              |
| Rad51         | RAD51 homolog ( <i>S. cerevisiae</i> )                                         |
| 1200015F23Rik | RIKEN cDNA 1200015F23 gene                                                     |
| Gchfr         | GTP cyclohydrolase I feedback regulator                                        |
| Dnajc17       | DnaJ (Hsp40) homolog, subfamily C, member 17                                   |
| Zfyve19       | zinc finger, FYVE domain containing 19                                         |
| Ppp1r14d      | protein phosphatase 1, regulatory (inhibitor) subunit 14D                      |
| Spint1        | serine protease inhibitor, Kunitz type 1                                       |

|               |                                                                         |
|---------------|-------------------------------------------------------------------------|
| Rhov          | ras homolog gene family, member V                                       |
| Vps18         | vacuolar protein sorting 18 (yeast)                                     |
| Dll4          | delta-like 4 (Drosophila)                                               |
| Chac1         | ChaC, cation transport regulator-like 1 (E. coli)                       |
| Ino80         | INO80 homolog (S. cerevisiae)                                           |
| Exdl1         | exonuclease 3'-5' domain-like 1                                         |
| 1500003O03Rik | RIKEN cDNA 1500003O03 gene                                              |
| 1700020I14Rik | RIKEN cDNA 1700020I14 gene                                              |
| Oip5          | Opa interacting protein 5                                               |
| Nusap1        | nucleolar and spindle associated protein 1                              |
| Ndufaf1       | NADH dehydrogenase (ubiquinone) 1 alpha subcomplex, assembly factor 1   |
| Rtf1          | Rtf1, Paf1/RNA polymerase II complex component, homolog (S. cerevisiae) |
| Itpka         | inositol 1,4,5-trisphosphate 3-kinase A                                 |
| Ltk           | leukocyte tyrosine kinase                                               |
| Rpap1         | RNA polymerase II associated protein 1                                  |
| Tyro3         | TYRO3 protein tyrosine kinase 3                                         |
| 6330405D24Rik | RIKEN cDNA 6330405D24 gene                                              |
| Mga           | MAX gene associated                                                     |
| Mapkbp1       | mitogen-activated protein kinase binding protein 1                      |
| Pla2g4b       | phospholipase A2, group IVB (cytosolic)                                 |
| Spnb5         | spectrin beta 5                                                         |
| Ehd4          | EH-domain containing 4                                                  |
| Pla2g4e       | phospholipase A2, group IVE                                             |
| Pla2g4d       | phospholipase A2, group IVD                                             |
| Pla2g4f       | phospholipase A2, group IVF                                             |
| Vps39         | vacuolar protein sorting 39 (yeast)                                     |
| Tmem87a       | transmembrane protein 87A                                               |
| Ganc          | glucosidase, alpha; neutral C                                           |
| Capn3         | calpain 3                                                               |

|               |                                                     |
|---------------|-----------------------------------------------------|
| Zfp106        | zinc finger protein 106                             |
| Snap23        | synaptosomal-associated protein 23                  |
| Lrrc57        | leucine rich repeat containing 57                   |
| Cep27         | centrosomal protein 27                              |
| Stard9        | START domain containing 9                           |
| Cdan1         | congenital dyserythropoietic anemia, type I (human) |
| Ttbk2         | tau tubulin kinase 2                                |
| AV039307      | expressed sequence AV039307                         |
| Ubr1          | ubiquitin protein ligase E3 component n-recognin 1  |
| Tmem62        | transmembrane protein 62                            |
| Rnu3b-ps2     | U3B small nuclear RNA pseudogene 2                  |
| Ccndbp1       | cyclin D-type binding-protein 1                     |
| Epb4.2        | erythrocyte protein band 4.2                        |
| Tgm5          | transglutaminase 5                                  |
| Tgm7          | transglutaminase 7                                  |
| Lcmt2         | leucine carboxyl methyltransferase 2                |
| Adal          | adenosine deaminase-like                            |
| Zscan29       | zinc finger SCAN domains 29                         |
| Tubgcp4       | tubulin, gamma complex associated protein 4         |
| Trp53bp1      | transformation related protein 53 binding protein 1 |
| Mtap1a        | microtubule-associated protein 1 A                  |
| Hisppd2a      | histidine acid phosphatase domain containing 2A     |
| Ckmt1         | creatine kinase, mitochondrial 1, ubiquitous        |
| Strc          | stereocilin                                         |
| Catsper2      | cation channel, sperm associated 2                  |
| Pdia3         | protein disulfide isomerase associated 3            |
| Ell3          | elongation factor RNA polymerase II-like 3          |
| Serinc4       | serine incorporator 4                               |
| Serf2         | small EDRK-rich factor 2                            |
| 2310003F16Rik | RIKEN cDNA 2310003F16 gene                          |
| Mfap1b        | microfibrillar-associated protein 1B                |

|               |                                                                                          |
|---------------|------------------------------------------------------------------------------------------|
| Mfap1a        | microfibrillar-associated protein 1A                                                     |
| Wdr76         | WD repeat domain 76                                                                      |
| Frdm5         | FERM domain containing 5                                                                 |
| Casc4         | cancer susceptibility candidate 4                                                        |
| Mageb3        | melanoma antigen, family B, 3                                                            |
| Ctdspl2       | CTD (carboxy-terminal domain, RNA polymerase II, polypeptide A) small phosphatase like 2 |
| Eif3j         | eukaryotic translation initiation factor 3, subunit J                                    |
| Spg11         | spastic paraplegia 11                                                                    |
| Patl2         | protein associated with topoisomerase II homolog 2 (yeast)                               |
| B2m           | beta-2 microglobulin                                                                     |
| Trim69        | tripartite motif-containing 69 tripartite motif-containing 69                            |
| 4933406J08Rik | RIKEN cDNA 4933406J08 gene                                                               |
| Sord          | sorbitol dehydrogenase                                                                   |
| Duox2         | dual oxidase 2                                                                           |
| Duoxa2        | dual oxidase maturation factor 2                                                         |
| Duoxa1        | dual oxidase maturation factor 1                                                         |
| Duox1         | dual oxidase 1                                                                           |
| Shf           | Src homology 2 domain containing F                                                       |
| Slc28a2       | solute carrier family 28 (sodium-coupled nucleoside transporter), member 2               |
| Bambi-ps1     | BMP and activin membrane-bound inhibitor, pseudogene ( <i>Xenopus laevis</i> )           |
| Gatm          | glycine amidinotransferase (L-arginine:glycine amidinotransferase)                       |
| Spata511      | spermatogenesis associated 5-like 1                                                      |
| AA467197      | expressed sequence AA467197                                                              |
| Mirn147       | microRNA 147                                                                             |
| Slc30a4       | solute carrier family 30 (zinc transporter), member 4                                    |
| 4930417H01Rik | RIKEN cDNA 4930417H01 gene                                                               |
| 4930580A09Rik | RIKEN cDNA 4930580A09 gene                                                               |
| Pldn          | pallidin                                                                                 |
| Sqrdl         | sulfide quinone reductase-like (yeast)                                                   |

---

**Supplementary table 2.** *Genes on chromosome 19 region from haplotype analysis.*

---

|               |                                                                        |
|---------------|------------------------------------------------------------------------|
| Acs15         | acyl-CoA synthetase long-chain family member 5                         |
| Zdhhc6        | zinc finger, DHHC domain containing 6                                  |
| Vti1a         | vesicle transport through interaction with t-SNAREs homolog 1A (yeast) |
| D730002M21Rik | RIKEN cDNA D730002M21 gene                                             |
| Habp2         | hyaluronic acid binding protein 2                                      |
| Nrap          | nebulin-related anchoring protein                                      |
| Casp7         | caspase 7                                                              |
| 9930023K05Rik | RIKEN cDNA 9930023K05 gene                                             |
| Dclre1a       | DNA cross-link repair 1A, PSO2 homolog ( <i>S. cerevisiae</i> )        |
| Nhlrc2        | NHL repeat containing 2                                                |
| Afap112       | actin filament associated protein 1-like 2                             |
| Ablim1        | actin-binding LIM protein 1                                            |
| Trub1         | TruB pseudouridine (psi) synthase homolog 1 ( <i>E. coli</i> )         |
| Atrn1         | attractin like 1                                                       |
| 2700078E11Rik | RIKEN cDNA 2700078E11 gene                                             |
| Nanos1        | nanos homolog 1 ( <i>Drosophila</i> )                                  |
| Eif3a         | eukaryotic translation initiation factor 3, subunit A                  |
| 1810055E12Rik | RIKEN cDNA 1810055E12 gene                                             |
| Sfxn4         | sideroflexin 4                                                         |
| Prdx3         | peroxiredoxin 3                                                        |
| Grk5          | G protein-coupled receptor kinase 5                                    |
| BC029127      | cDNA sequence BC029127                                                 |

---
